# Supplementary material
Source: PubMed Central journal article supplement (PMC7449168)
Supplement: AAC.00177-20-s0001.pdf [file AAC.00177-20-s0001.pdf]

Table S1. Regression coefficients and 95% confidence intervals for the relationship between age groups and dATP and dCTP, using the older ( $\geq 60$  years) group as the reference, from linear models adjusting for clinical and demographic covariates.

| Parameter                                 |                                  | dATP                                |         | dCTP                                |         |
|-------------------------------------------|----------------------------------|-------------------------------------|---------|-------------------------------------|---------|
|                                           |                                  | Effect<br>(95% confidence interval) | p-value | Effect<br>(95% confidence interval) | p-value |
| <b>Intercept</b>                          |                                  | 2.66 (0.62,4.70)                    | 0.011   | 2.20 (0.73,3.68)                    | 0.0035  |
| <b>Age Group</b>                          | $\leq 45$ years                  | -0.21 (-0.48,0.062)                 | 0.13    | -0.051 (-0.25,0.14)                 | 0.61    |
|                                           | $\geq 60$ years<br>(reference)   |                                     |         |                                     |         |
| <b>Current Smoking Status</b>             | Current Smoker                   | 0.0059<br>(-0.18,0.19)              | 0.95    | -0.039<br>(-0.17,0.095)             | 0.57    |
|                                           | Current Nonsmoker<br>(reference) |                                     |         |                                     |         |
| <b>Race</b>                               | Black                            | -0.20 (-0.51,0.11)                  | 0.20    | 0.12 (-0.10,0.34)                   | 0.29    |
|                                           | Other                            | -0.14 (-0.49,0.20)                  | 0.41    | 0.080 (-0.17,0.33)                  | 0.53    |
|                                           | White<br>(reference)             |                                     |         |                                     |         |
| <b>ART<sup>a</sup> Background</b>         | Other                            | 0.015 (-0.35,0.38)                  | 0.94    | 0.075 (-0.19,0.34)                  | 0.58    |
|                                           | Integrase Inhibitor              | -0.0059<br>(-0.22,0.21)             | 0.96    | -0.028<br>(-0.18,0.13)              | 0.73    |
|                                           | Atazanavir OR Lopinavir          | 0.019 (-0.24,0.28)                  | 0.89    | 0.11 (-0.075,0.30)                  | 0.24    |
|                                           | Darunavir                        | 0.23 (-0.074,0.53)                  | 0.14    | 0.12 (-0.10,0.34)                   | 0.30    |
|                                           | Efavirenz<br>(reference)         |                                     |         |                                     |         |
| <b>log<sub>10</sub>(eGFR)<sup>b</sup></b> |                                  | 0.074 (-0.89,1.04)                  | 0.88    | 0.092 (-0.61,0.79)                  | 0.80    |
| <b>Any Hypertension</b>                   | Yes                              | -0.011 (-0.21,0.18)                 | 0.91    | -0.053 (-0.20,0.089)                | 0.46    |
|                                           | No (reference)                   |                                     |         |                                     |         |
| <b>Any Diabetes</b>                       | Yes                              | 0.11 (-0.13,0.36)                   | 0.36    | 0.19 (0.011,0.37)                   | 0.038   |
|                                           | No (reference)                   |                                     |         |                                     |         |
| <b>log<sub>10</sub>(APRI)<sup>c</sup></b> |                                  | -0.21 (-0.51,0.094)                 | 0.18    | -0.32 (-0.54,-0.098)                | 0.0046  |
| <b>log<sub>10</sub>(BMI)<sup>d</sup></b>  |                                  | -0.095 (-0.83,0.65)                 | 0.80    | 0.016 (-0.52,0.55)                  | 0.95    |
| <b>Scale</b>                              |                                  | 0.50 (0.44,0.56)                    |         | 0.36 (0.32,0.40)                    |         |

a ART: antiretroviral therapy

b eGFR: estimated glomerular filtration rate, as calculated by the CKD-EPI equation

c APRI: AST-to-platelet ratio index

d BMI: body mass index; reported in 59 women in the older group and 83 in the younger group; 3/59 and 1/83 in the older and younger groups, respectively, used imputed values from the WIHS visit immediately before or after the visit of interest

Table S2. Regression coefficients and 95% confidence intervals for the relationship between age groups and emtricitabine triphosphate (FTCtp) and tenofovir diphosphate (TFVdp), using the older ( $\geq 60$  years) group as the reference, from linear models adjusting for clinical and demographic covariates.

| Parameter                                       |                               | FTCtp                            |         | TFVdp                            |         |
|-------------------------------------------------|-------------------------------|----------------------------------|---------|----------------------------------|---------|
|                                                 |                               | Effect (95% confidence interval) | p-value | Effect (95% confidence interval) | p-value |
| <b>Intercept</b>                                |                               | 3.91 (1.92,5.89)                 | 0.00012 | 4.88 (3.24,6.52)                 | <0.0001 |
| <b>Age Group</b>                                | $\leq 45$ years               |                                  |         |                                  |         |
|                                                 | $\geq 60$ years (reference)   | -0.067 (-0.33,0.20)              | 0.62    | -0.17 (-0.38,0.049)              | 0.13    |
| <b>Current Smoking Status</b>                   | Current Smoker                |                                  |         |                                  |         |
|                                                 | Current Nonsmoker (reference) | 0.054 (-0.13,0.23)               | 0.55    | -0.0083 (-0.16,0.14)             | 0.91    |
| <b>Race</b>                                     | Black                         | -0.28 (-0.58,0.022)              | 0.069   | -0.026 (-0.27,0.22)              | 0.83    |
|                                                 | Other                         | -0.040 (-0.38,0.30)              | 0.82    | -0.063 (-0.34,0.22)              | 0.66    |
|                                                 | White (reference)             |                                  |         |                                  |         |
| <b>ART<sup>a</sup> Background</b>               | Other                         | -0.17 (-0.52,0.19)               | 0.35    | 0.10 (-0.19,0.40)                | 0.50    |
|                                                 | Integrase Inhibitor           | -0.12 (-0.33,0.086)              | 0.25    | 0.049 (-0.12,0.22)               | 0.58    |
|                                                 | Atazanavir OR Lopinavir       | 0.074 (-0.18,0.32)               | 0.56    | 0.048 (-0.16,0.25)               | 0.65    |
|                                                 | Darunavir                     | 0.13 (-0.17,0.42)                | 0.40    | 0.14 (-0.099,0.39)               | 0.25    |
|                                                 | Efavirenz (reference)         |                                  |         |                                  |         |
| <b>log<sub>10</sub>(EGFR)<sup>b</sup></b>       |                               | 0.10 (-0.84,1.04)                | 0.83    | -0.82 (-1.60,-0.049)             | 0.037   |
| <b>Any Hypertension</b>                         | Yes                           |                                  |         |                                  |         |
|                                                 | No (reference)                | -0.023 (-0.21,0.17)              | 0.81    | -0.11 (-0.27,0.046)              | 0.17    |
| <b>Any Diabetes</b>                             | Yes                           |                                  |         |                                  |         |
|                                                 | No (reference)                | 0.25 (0.0045,0.49)               | 0.046   | 0.19 (-0.012,0.39)               | 0.066   |
| <b>log<sub>10</sub>(APRI)<sup>c</sup></b>       |                               | -0.33 (-0.62,-0.033)             | 0.029   | -0.24 (-0.49,0.00020)            | 0.050   |
| <b>log<sub>10</sub>((BMI)<sup>d</sup> Scale</b> |                               | -0.17 (-0.89,0.55)               | 0.65    | -0.80 (-1.39,-0.20)              | 0.0085  |
|                                                 |                               | 0.48 (0.43,0.54)                 |         | 0.40 (0.35,0.45)                 |         |

a ART: antiretroviral therapy

b eGFR: estimated glomerular filtration rate, as calculated by the CKD-EPI equation

c APRI: AST-to-platelet ratio index

d BMI: body mass index; reported in 59 women in the older group and 83 in the younger group; 3/59 and 1/83 in the older and younger groups, respectively, used imputed values from the WIHS visit immediately before or after the visit of interest

Table S3. Regression coefficients and 95% confidence intervals for the relationship between age groups and the tenofovir diphosphate (TFVdp):dATP ratio and the emtricitabine triphosphate (FTCtp):dCTP ratio, using the older ( $\geq 60$  years) group as the reference, from linear models adjusting for clinical and demographic covariates.

| Parameter                                 |                                  | TFVdp:dATP ratio                    |         | FTCtp:dCTP ratio                    |         |
|-------------------------------------------|----------------------------------|-------------------------------------|---------|-------------------------------------|---------|
|                                           |                                  | Effect<br>(95% confidence interval) | p-value | Effect<br>(95% confidence interval) | p-value |
| <b>Intercept</b>                          |                                  | 2.32 (0.83,3.82)                    | 0.0024  | 1.70 (-0.24,3.64)                   | 0.085   |
| <b>Age Group</b>                          | $\leq 45$ years                  |                                     |         |                                     |         |
|                                           | $\geq 60$ years<br>(reference)   | 0.037 (-0.16,0.24)                  | 0.72    | -0.016 (-0.27,0.24)                 | 0.90    |
| <b>Current Smoking Status</b>             | Current Smoker                   |                                     |         |                                     |         |
|                                           | Current Nonsmoker<br>(reference) | -0.0093 (-0.15,0.13)                | 0.89    | 0.093 (-0.082,0.27)                 | 0.30    |
| <b>Race</b>                               | Black                            | 0.16 (-0.065,0.38)                  | 0.16    | -0.40 (-0.69,-0.11)                 | 0.0075  |
|                                           | Other                            | 0.064 (-0.19,0.32)                  | 0.62    | -0.12 (-0.45,0.21)                  | 0.48    |
|                                           | White<br>(reference)             |                                     |         |                                     |         |
| <b>ART<sup>a</sup> Background</b>         | Other                            | 0.10 (-0.17,0.37)                   | 0.46    | -0.24 (-0.59,0.10)                  | 0.17    |
|                                           | Integrase Inhibitor              | 0.059 (-0.10,0.22)                  | 0.47    | -0.097 (-0.30,0.11)                 | 0.35    |
|                                           | Atazanavir OR Lopinavir          | 0.044 (-0.15,0.23)                  | 0.65    | -0.037 (-0.28,0.21)                 | 0.77    |
|                                           | Darunavir                        | -0.069 (-0.29,0.15)                 | 0.54    | 0.0092 (-0.28,0.30)                 | 0.95    |
|                                           | Efavirenz<br>(reference)         |                                     |         |                                     |         |
| <b>log<sub>10</sub>(EGFR)<sup>b</sup></b> |                                  | -0.95 (-1.65,-0.24)                 | 0.0085  | 0.0090 (-0.91,0.92)                 | 0.98    |
| <b>Any Hypertension</b>                   | Yes                              |                                     |         |                                     |         |
|                                           | No (reference)                   | -0.096 (-0.24,0.049)                | 0.20    | 0.031 (-0.16,0.22)                  | 0.74    |
| <b>Any Diabetes</b>                       | Yes                              |                                     |         |                                     |         |
|                                           | No (reference)                   | 0.089 (-0.092,0.27)                 | 0.33    | 0.055 (-0.18,0.29)                  | 0.65    |
| <b>log<sub>10</sub>(APRI)<sup>c</sup></b> |                                  | -0.072 (-0.30,0.15)                 | 0.53    | -0.010 (-0.30,0.28)                 | 0.94    |
| <b>log<sub>10</sub>(BMI)<sup>d</sup></b>  |                                  | -0.73 (-1.27,-0.18)                 | 0.0086  | -0.18 (-0.89,0.52)                  | 0.61    |
| <b>Scale</b>                              |                                  | 0.36 (0.32,0.41)                    |         | 0.47 (0.42,0.53)                    |         |

a ART: antiretroviral therapy

b eGFR: estimated glomerular filtration rate, as calculated by the CKD-EPI equation

c APRI: AST-to-platelet ratio index

d BMI: body mass index; reported in 59 women in the older group and 83 in the younger group; 3/59 and 1/83 in the older and younger groups, respectively, used imputed values from the WIHS visit immediately before or after the visit of interest

Table S4. Regression coefficients and 95% confidence intervals for the relationship between age groups and IL-6 and sCD163 concentrations, using the older ( $\geq 60$  years) group as the reference, from linear models adjusting for clinical and demographic covariates.

| Parameter                                 |                               | IL-6                             |         | sCD163                           |         |
|-------------------------------------------|-------------------------------|----------------------------------|---------|----------------------------------|---------|
|                                           |                               | Effect (95% confidence interval) | p-value | Effect (95% confidence interval) | p-value |
| <b>Intercept</b>                          |                               | 0.79 (-2.61,4.19)                | 0.65    | 1.70 (0.84,2.57)                 | 0.00011 |
| <b>Age Group</b>                          | $\leq 45$ years               |                                  |         |                                  |         |
|                                           | $\geq 60$ years (reference)   | 0.10 (-0.40,0.60)                | 0.69    | -0.13 (-0.24,-0.016)             | 0.025   |
| <b>Current Smoking Status</b>             | Current Smoker                |                                  |         |                                  |         |
|                                           | Current Nonsmoker (reference) | 0.21 (-0.14,0.55)                | 0.25    | 0.020 (-0.058,0.098)             | 0.61    |
| <b>Race</b>                               | Black                         | 0.30 (-0.28,0.87)                | 0.32    | 0.022 (-0.11,0.15)               | 0.74    |
|                                           | Other                         | 0.57 (-0.11,1.25)                | 0.10    | 0.16 (0.0097,0.30)               | 0.037   |
|                                           | White (reference)             |                                  |         |                                  |         |
| <b>ART<sup>a</sup> Background</b>         | Other                         | 0.63 (-0.055,1.31)               | 0.071   | 0.11 (-0.044,0.27)               | 0.16    |
|                                           | Integrase Inhibitor           | -0.020 (-0.43,0.39)              | 0.92    | 0.064 (-0.028,0.15)              | 0.17    |
|                                           | Atazanavir OR Lopinavir       | 0.52 (0.042,1.00)                | 0.033   | 0.0096 (-0.099,0.12)             | 0.86    |
|                                           | Darunavir                     | -0.087 (-0.66,0.48)              | 0.76    | -0.13 (-0.26,-0.0020)            | 0.047   |
|                                           | Efavirenz (reference)         |                                  |         |                                  |         |
| <b>log<sub>10</sub>(EGFR)<sup>b</sup></b> |                               | -0.65 (-2.44,1.15)               | 0.48    | 0.42 (0.012,0.83)                | 0.044   |
| <b>Any Hypertension</b>                   | Yes                           |                                  |         |                                  |         |
|                                           | No (reference)                | 0.089 (-0.28,0.46)               | 0.63    | -0.035 (-0.12,0.048)             | 0.41    |
| <b>Any Diabetes</b>                       | Yes                           |                                  |         |                                  |         |
|                                           | No (reference)                | -0.066 (-0.54,0.41)              | 0.79    | 0.0039 (-0.10,0.11)              | 0.94    |
| <b>log<sub>10</sub>(APRI)<sup>c</sup></b> |                               | -0.43 (-0.99,0.14)               | 0.14    | 0.19 (0.063,0.32)                | 0.0035  |
| <b>log<sub>10</sub>(BMI)<sup>d</sup></b>  |                               | NA                               | NA      | 0.39 (0.075,0.70)                | 0.015   |
| <b>BMI<sup>e</sup> (categorical)</b>      | Underweight (<18.5)           | -0.55 (-1.39,0.30)               | 0.21    |                                  |         |
|                                           | Normal (18.5-24.9)            | -1.02 (-1.49,-0.54)              | <0.0001 | NA                               | NA      |
|                                           | Overweight (25-29.9)          | -0.48 (-0.94,-0.013)             | 0.044   |                                  |         |

|              |                                      |                        |      |                  |  |
|--------------|--------------------------------------|------------------------|------|------------------|--|
|              | Obese (30-34.9)                      | -0.034<br>(-0.48,0.42) | 0.88 |                  |  |
|              | Extremely obese (>35)<br>(reference) |                        |      |                  |  |
| <b>Scale</b> |                                      | 0.92 (0.81,1.04)       |      | 0.21 (0.19,0.24) |  |

*a* ART: antiretroviral therapy

*b* eGFR: estimated glomerular filtration rate, as calculated by the CKD-EPI equation

*c* APRI: AST-to-platelet ratio index

*d* BMI: body mass index, as a continuous variable for the sCD163 model; reported in 59 women in the older group and 83 in the younger group; 3/59 and 1/83 in the older and younger groups, respectively, used imputed values from the WIHS visit immediately before or after the visit of interest

*e* BMI: body mass index, as a categorical variable for the IL-6 model; reported in 59 women in the older group and 83 in the younger group; 3/59 and 1/83 in the older and younger groups, respectively, used imputed values from the WIHS visit immediately before or after the visit of interest

Table S5. Regression coefficients and 95% confidence intervals for the relationship between age groups and % senescent cells, using the older ( $\geq 60$  years) group as the reference, from linear models adjusting for clinical and demographic covariates.

| Parameter                                 |                               | % Senescent Cells (+1 on log scale) |         |
|-------------------------------------------|-------------------------------|-------------------------------------|---------|
|                                           |                               | Effect<br>(95% confidence interval) | p-value |
| <b>Intercept</b>                          |                               | 0.11 (-1.24,1.47)                   | 0.87    |
| <b>Age Group</b>                          | $\leq 45$ years               | -0.10 (-0.28,0.074)                 | 0.25    |
|                                           | $\geq 60$ years (reference)   |                                     |         |
| <b>Current Smoking Status</b>             | Current Smoker                | 0.058 (-0.064,0.18)                 | 0.35    |
|                                           | Current Nonsmoker (reference) |                                     |         |
| <b>Race</b>                               | Black                         | -0.14 (-0.33,0.062)                 | 0.18    |
|                                           | Other                         | -0.045 (-0.27,0.18)                 | 0.69    |
|                                           | White (reference)             |                                     |         |
| <b>ART<sup>a</sup> Background</b>         | Other                         | -0.083 (-0.31,0.15)                 | 0.47    |
|                                           | Integrase Inhibitor           | 0.093 (-0.045,0.23)                 | 0.19    |
|                                           | Atazanavir OR Lopinavir       | 0.059 (-0.11,0.23)                  | 0.50    |
|                                           | Darunavir                     | 0.10 (-0.10,0.31)                   | 0.33    |
|                                           | Efavirenz (reference)         |                                     |         |
| <b>log<sub>10</sub>(EGFR)<sup>b</sup></b> |                               | 0.10 (-0.52,0.73)                   | 0.74    |
| <b>Any Hypertension</b>                   | Yes                           | 0.032 (-0.095,0.16)                 | 0.63    |
|                                           | No (reference)                |                                     |         |
| <b>Any Diabetes</b>                       | Yes                           | -0.035 (-0.19,0.12)                 | 0.67    |
|                                           | No (reference)                |                                     |         |
| <b>log<sub>10</sub>(APRI)<sup>c</sup></b> |                               | 0.079 (-0.11,0.27)                  | 0.42    |
| <b>log<sub>10</sub>(BMI)<sup>d</sup></b>  |                               | 0.40 (-0.092,0.89)                  | 0.11    |
| <b>Scale</b>                              |                               | 0.31 (0.27,0.35)                    |         |

*a* ART: antiretroviral therapy

*b* eGFR: estimated glomerular filtration rate, as calculated by the CKD-EPI equation

*c* APRI: AST-to-platelet ratio index

*d* BMI: body mass index; reported in 59 women in the older group and 83 in the younger group; 3/59 and 1/83 in the older and younger groups, respectively, used imputed values from the WIHS visit immediately before or after the visit of interest
